# Supplementary material for: A simple electrochemical aptasensor for saxitoxin detection
Source: Royal Society of Chemistry journal article supplement (doi:10.1039/d2ra03690h), 2022-01-01
Supplement: d2ra03690h1.pdf [file d2ra03690h1.pdf]

## Supporting Information

### A simple electrochemical aptasensor for saxitoxin detection

Weixian Zheng, Xinyu Liu, Qianwen Li, Zuju Shu, Zhongbo Li\*, Lijun Zhang\*

College of Light-Textile Engineering and Art, Anhui Agriculture University, Hefei, 230009, China

E-mail: [zbli@ahau.edu.cn](mailto:zbli@ahau.edu.cn) (Zhongbo Li)

[Ljunzhang@ahau.edu.cn](mailto:Ljunzhang@ahau.edu.cn) (Lijun Zhang)

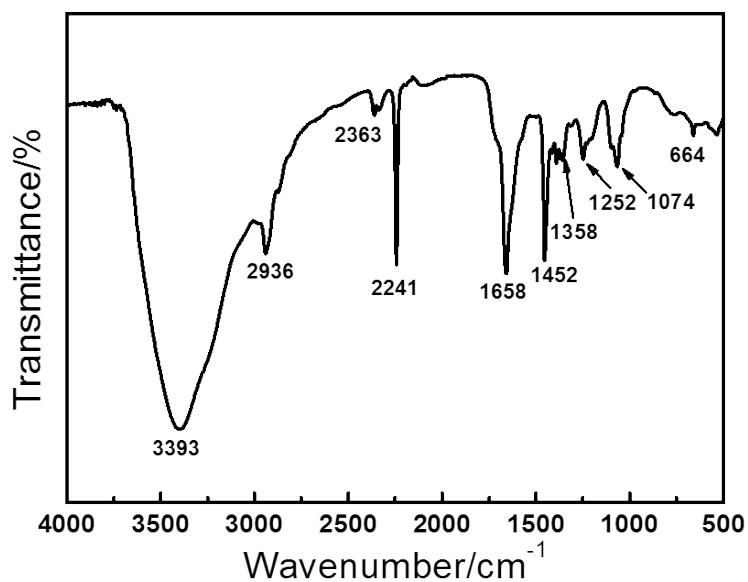

Fig. S1 FTIR of MB-Apt modified electrode

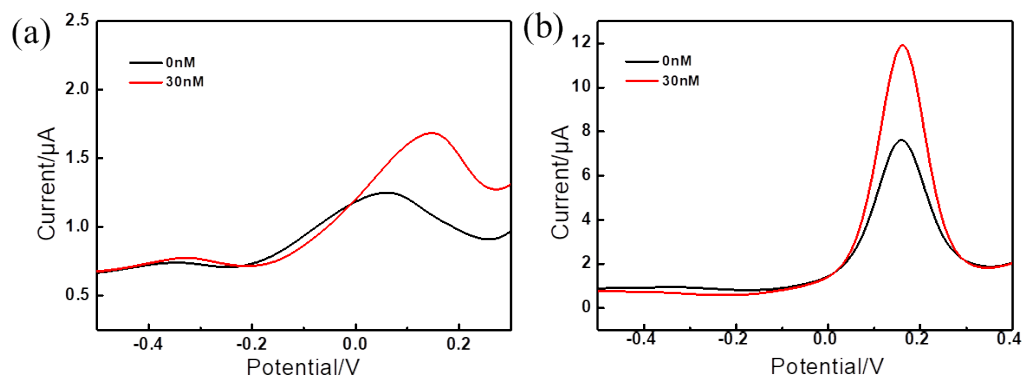

Fig. S2 The DPVs of the aptasensor in (a) PBS (pH=7) solutions and (b)  $K_3[Fe(CN)_6]/K_4[Fe(CN)_6]$  (1:1) solutions

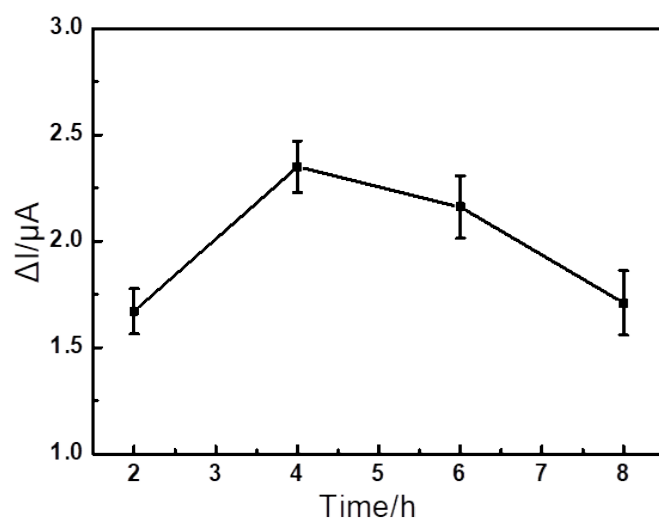

**Fig. S3** The effect of the immobilization time of MB-Apt on the change of anodic peak current ( $\Delta I$ ) obtained in 1 mM  $\text{K}_3[\text{Fe}(\text{CN})_6]/\text{K}_4[\text{Fe}(\text{CN})_6]$  (1:1) solution containing 0.1 M KCl. (Scan rate of DPV:  $25 \text{ mV} \cdot \text{S}^{-1}$ )

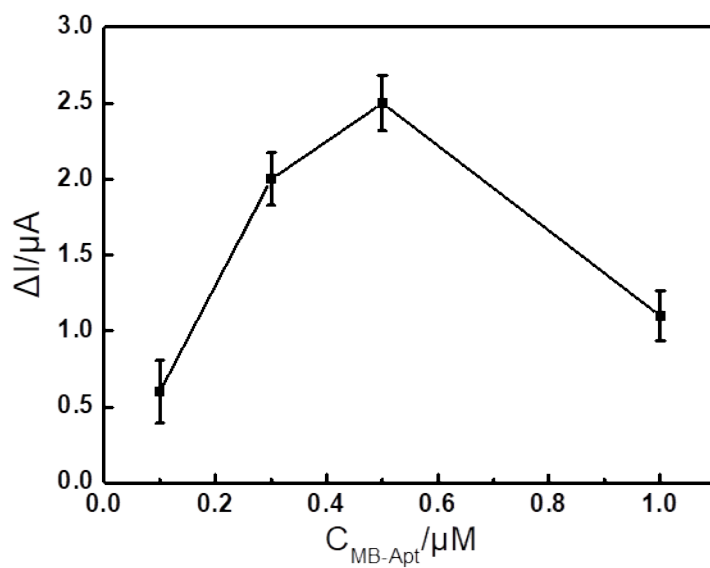

**Fig. S4** The relationship between the aptamer concentration and the change of anodic peak current ( $\Delta I$ ) obtained 1 mM  $\text{K}_3[\text{Fe}(\text{CN})_6]/\text{K}_4[\text{Fe}(\text{CN})_6]$  (1:1) solution containing 0.1 M KCl. (Scan rate of DPV:  $25 \text{ mV} \cdot \text{S}^{-1}$ )

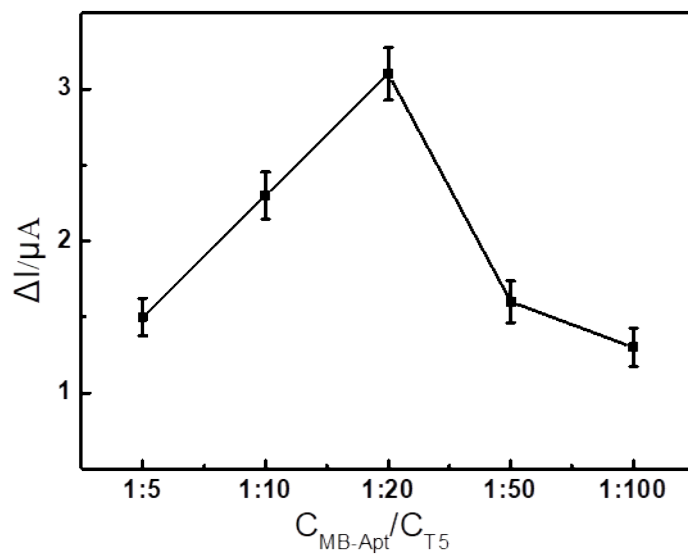

**Fig. S5** The relationship between the  $C_{\text{MB-Apt}}/C_{\text{T5}}$  and the relative anodic peak current ( $\Delta I$ ) obtained 1 mM  $\text{K}_3[\text{Fe}(\text{CN})_6]/\text{K}_4[\text{Fe}(\text{CN})_6]$  (1:1) solution containing 0.1 M KCl.

(Scan rate of DPV:  $25 \text{ mV} \cdot \text{S}^{-1}$ )

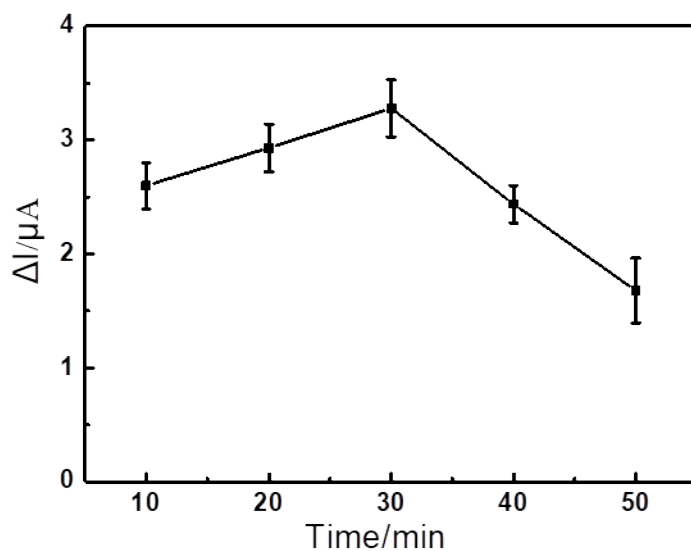

**Fig. S6** The effect of incubation time on the relative anodic peak current ( $\Delta I$ ) obtained in 1 mM  $\text{K}_3[\text{Fe}(\text{CN})_6]/\text{K}_4[\text{Fe}(\text{CN})_6]$  (1:1) solution containing 0.1 M KCl. (Scan rate of

DPV:  $25 \text{ mV} \cdot \text{S}^{-1}$ )

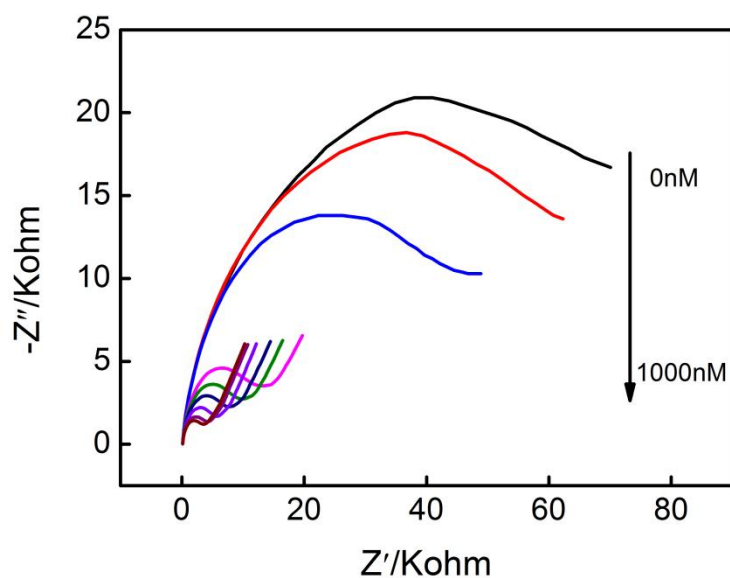

**Fig. S7** EIS obtained for aptasensor after incubation with different concentrations of STX (0, 1, 5, 10, 30, 100, 300, 500, 1000 nM, respectively) in 1 mM  $K_3[Fe(CN)_6]/K_4[Fe(CN)_6]$  (1:1) solution containing 0.1 M KCl. Biasing potential: 0.175 V.

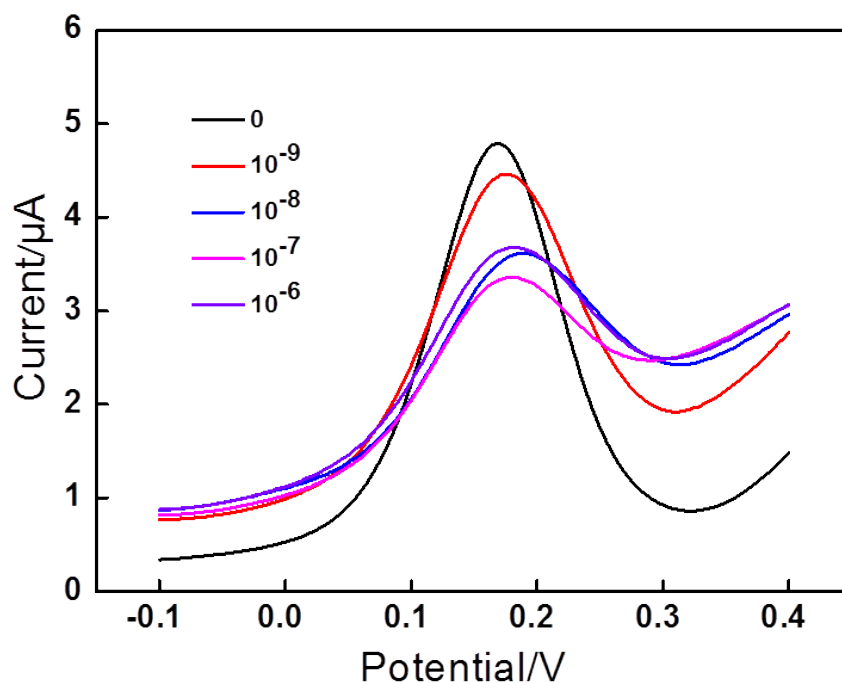

**Fig. S8** DPVs obtained for electrochemical sensor modified with T5 after incubation with different concentrations of STX in 1 mM  $K_3[Fe(CN)_6]/K_4[Fe(CN)_6]$  (1:1) solution containing 0.1 M KCl. (Scan rate of DPV:  $25 \text{ mV} \cdot \text{S}^{-1}$ )

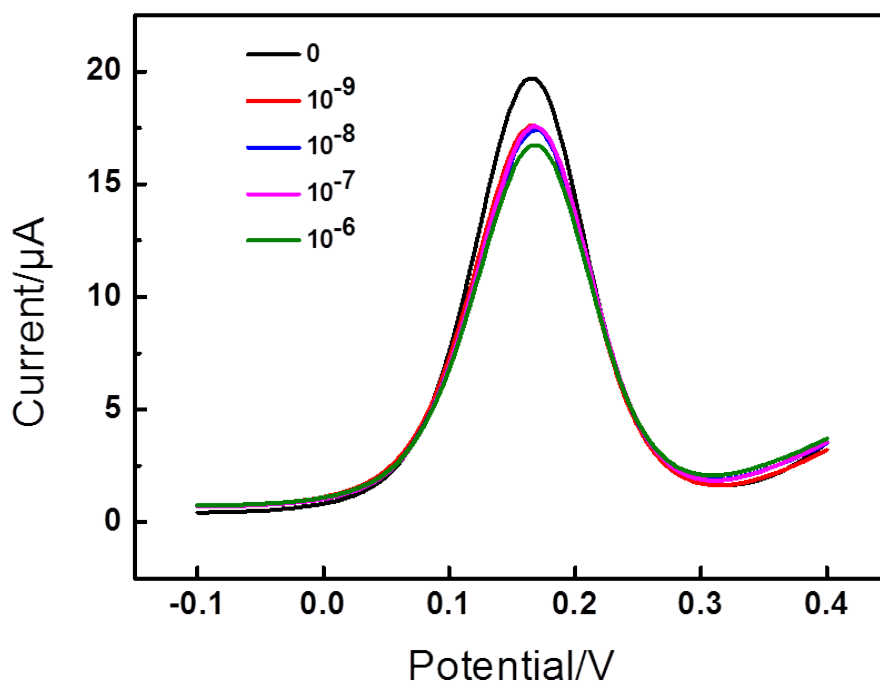

**Fig. S9** DPVs obtained for electrochemical sensor without modification after incubation with different concentrations of STX in 1 mM  $K_3[Fe(CN)_6]/K_4[Fe(CN)_6]$  (1:1) solution containing 0.1 M KCl. (Scan rate of DPV:  $25 \text{ mV} \cdot \text{S}^{-1}$ )

Table S1. Reproducibility of STX (10 nM) detection by the electrochemical aptasensors.

| $\Delta I$ |      |      |      |      |         | RSD (%) |
|------------|------|------|------|------|---------|---------|
| 1          | 2    | 3    | 4    | 5    | Average |         |
| 2.18       | 2.31 | 2.29 | 2.05 | 2.35 | 2.24    | 8.50    |

Table S2. Real samples analysis (n = 3)

| Real Samples | Added ( nM) | Detection (nM) | Recovery (%) | RSD (%) |
|--------------|-------------|----------------|--------------|---------|
| shellfish    | 3           | 2.7            | 84-106       | 9.8     |
|              | 10          | 9.9            | 96-105       | 6.8     |
|              | 30          | 29.5           | 94-112       | 8.5     |
